# Supplementary material
Source: publisher site journal article supplement (https://www.dovepress.com/get_supplementary_file.php?f=505702.docx)

Supplemental material for the manuscript entitled

‘The hourly apnea-hypopnea duration better correlates with OSA-related nocturnal hypoxemia and excessive daytime sleepiness rather than AHI’ by

Yuhan Wang, Wuriliga Yue, Beini Zhou, Jingyi Zhang, Yang He, Mengcan Wang, Ke Hu

**Supplementary Table S1. The association between sleep respiratory parameters and mean** **SpO2.**

|  | Model 1 |  | Model 2 |  |
| --- | --- | --- | --- | --- |
| Variables | β (95%CI) | P-value | β (95%CI) | P-value |
| AHI, events/h (continuous) | **-0.05 (-0.06, -0.05)** | <0.0001 | **-0.05 (-0.05, -0.04)** | <0.0001 |
| MAD, s (continuous) | 0.01 (-0.03, 0.05) | 0.7617 | 0.00 (-0.04, 0.04) | 0.9595 |
| HAD, minutes (continuous) | **-0.14 (-0.15, -0.12)** | <0.0001 | **-0.13 (-0.14, -0.11)** | <0.0001 |

Note: Significant results are in bold.

Abbreviations: BMI, body mass index; AHI, apnea–hypopnea index; MAD, mean apnea–hypopnea duration; HAD, hourly apnea–hypopnea duration; mean SpO2, mean oxygen saturation by pulse oximetry; β, effect size; 95% Cl, 95% confidence interval. Model 1: no covariates were adjusted. Model 2: adjusted for age, sex and BMI.

**Supplementary Table S2. The association between sleep respiratory parameters grouped by tertiles and mean SpO2.**

|  | Model 1 |  | Model 2 |  |
| --- | --- | --- | --- | --- |
| Variables | β (95%CI) | P-value | β (95%CI) | P-value |
| AHI mild/moderate/severe |  |  |  |  |
| L1 | Reference |  | Reference |  |
| L2 | **-0.39 (-0.69, -0.09)** | 0.0120 | -0.27 (-0.57, 0.03) | 0.0785 |
| L3 | **-1.73 (-2.00, -1.46)** | <0.0001 | **-1.43 (-1.71, -1.14)** | <0.0001 |
| P for trend | <0.001 |  | <0.001 |  |
| MAD tertile |  |  |  |  |
| T1 | Reference |  | Reference |  |
| T2 | -0.01 (-0.34, 0.32) | 0.9670 | 0.00 (-0.31, 0.32) | 0.9850 |
| T3 | 0.08 (-0.22, 0.38) | 0.5865 | 0.07 (-0.22, 0.36) | 0.6407 |
| P for trend | 0.589 |  | 0.643 |  |
| HAD tertile |  |  |  |  |
| T1 | Reference |  | Reference |  |
| T2 | **-0.40 (-0.68, -0.12)** | 0.0053 | **-0.29 (-0.57, -0.01)** | 0.0392 |
| T3 | **-1.94 (-2.22, -1.66)** | <0.0001 | **-1.64 (-1.94, -1.35)** | <0.0001 |
| P for trend | <0.001 |  | <0.001 |  |

Note: Significant results are in bold.

Abbreviations: BMI, body mass index; AHI, apnea–hypopnea index; MAD, mean apnea–hypopnea duration; HAD, hourly apnea–hypopnea duration; mean SpO2, mean oxygen saturation by pulse oximetry; β, effect size; 95% Cl, 95% confidence interval. AHI was categorized into three levels, namely, mild 5 ≤ AHI < 15 (L1), moderate 15 ≤ AHI < 30 (L2) and severe AHI ≥ 30 (L3) according to clinical standards. The MAD (s) and HAD (min), were stratified based on tertiles and labelled as T1 through T3. The first category of each index served as the reference.

Model 1: no covariates were adjusted. Model 2: adjusted for age, sex and BMI.

**Supplementary Table S3. The association between Z-score of sleep breathing parameters and mean SpO2.**

| β (95%CI), P-value | | | |
| --- | --- | --- | --- |
| Z-score | AHI, events/h | MAD, s | HAD, minutes |
| Continuous | **-0.85 (-0.97, -0.74)** <0.0001  (Per 1 SD increase) | 0.00 (-0.12, 0.12) 0.9595  (Per 1 SD increase) | **-0.91 (-1.02, -0.79)** <0.0001  (Per 1 SD increase) |

Note: Significant results are in bold.

Abbreviations: BMI, body mass index; AHI, apnea–hypopnea index; MAD, mean apnea–hypopnea duration; HAD, hourly apnea–hypopnea duration; mean SpO2, mean oxygen saturation; β, effect size; 95% Cl, 95% confidence interval; SD, standard deviation. Adjusted for age, sex and BMI.

**Supplementary Table S4. The association between sleep respiratory parameters and nocturnal hypoxemia was analyzed by Bonferroni method.**

|  | Adjusted for multiple testing correction using Bonferroni method |  |
| --- | --- | --- |
| Variables | OR (95%CI) | P-value |
| AHI, events/h (continuous) | **1.07 (1.06, 1.08)** | <0.0001 |
| MAD, s (continuous) | 1.00 (0.95, 1.06) | 1.0000 |
| HAD, minutes (continuous) | **1.20 (1.16, 1.24)** | <0.0001 |

Note: Significant results are in bold.

Abbreviations: BMI, body mass index; AHI, apnea–hypopnea index; MAD, mean apnea–hypopnea duration; HAD, hourly apnea–hypopnea duration; mean SpO2, mean oxygen saturation; OR, odds ratio; 95% Cl, 95% confidence interval. Adjusted for age, sex and BMI.

**Supplementary Table S5. The association between sleep respiratory parameters and mean SpO2 was analyzed by Bonferroni method.**

|  | Adjusted for multiple testing correction using Bonferroni method |  |
| --- | --- | --- |
| Variables | β (95%CI) | P-value |
| AHI, events/h (continuous) | **-0.05 (-0.05, -0.04)** | <0.0001 |
| MAD, s (continuous) | 0.00 (-0.05, 0.05) | 1.0000 |
| HAD, minutes (continuous) | **-0.13 (-0.15, -0.10)** | <0.0001 |

Note: Significant results are in bold.

Abbreviations: BMI, body mass index; AHI, apnea–hypopnea index; MAD, mean apnea–hypopnea duration; HAD, hourly apnea–hypopnea duration; mean SpO2, mean oxygen saturation; β, effect size; 95% Cl, 95% confidence interval. Adjusted for age, sex and BMI.

**Supplementary Table S6. Results of the Hosmer-Lemeshow test for the logistic regression model with continuous independent variables.**

| Variable | X-squared | df | p-value |
| --- | --- | --- | --- |
| HAD | 9.8151 | 8 | 0.2782 |
| AHI | 3.6741 | 8 | 0.8853 |
| MAD | 11.127 | 8 | 0.1946 |

Note: Significant results are in bold.

Abbreviations: X-squared, chi-squared statistic; df, degrees of freedom.

**Supplementary Figure S1. Variance inflation factor was used to assess multicollinearity in the linear regression model for the continuous independent variable AHI.**

**Supplementary Figure S2. Variance inflation factor was used to assess multicollinearity in the linear regression model for the continuous independent variable MAD.**

**Supplementary Figure S3. Variance inflation factor was used to assess multicollinearity in the linear regression model for the continuous independent variable HAD.**

**Supplementary Figure S4. Comparison of observed and predicted values ​​of the nocturnal hypoxemia prediction model by group (based on AHI, age, sex, and BMI)**


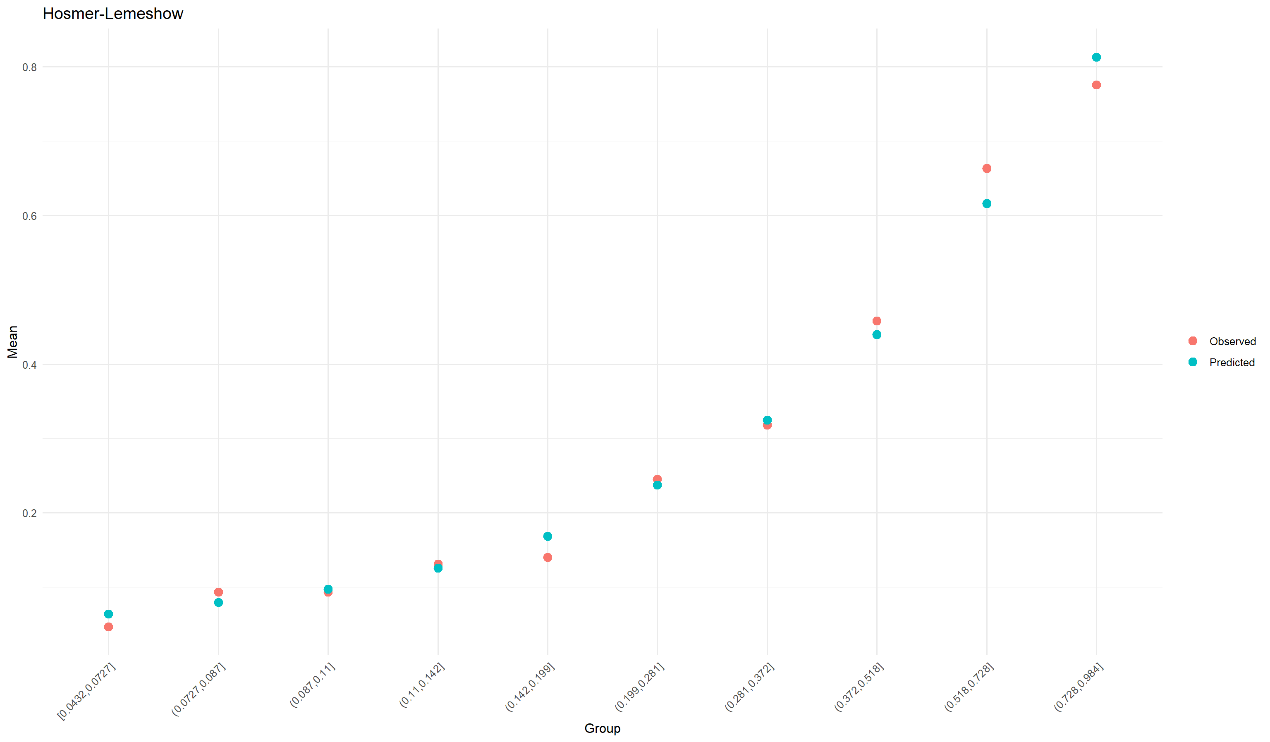


**Supplementary Figure S5. Comparison of observed and predicted values ​​of the nocturnal hypoxemia prediction model by group (based on MAD,** **age, sex, and BMI)**


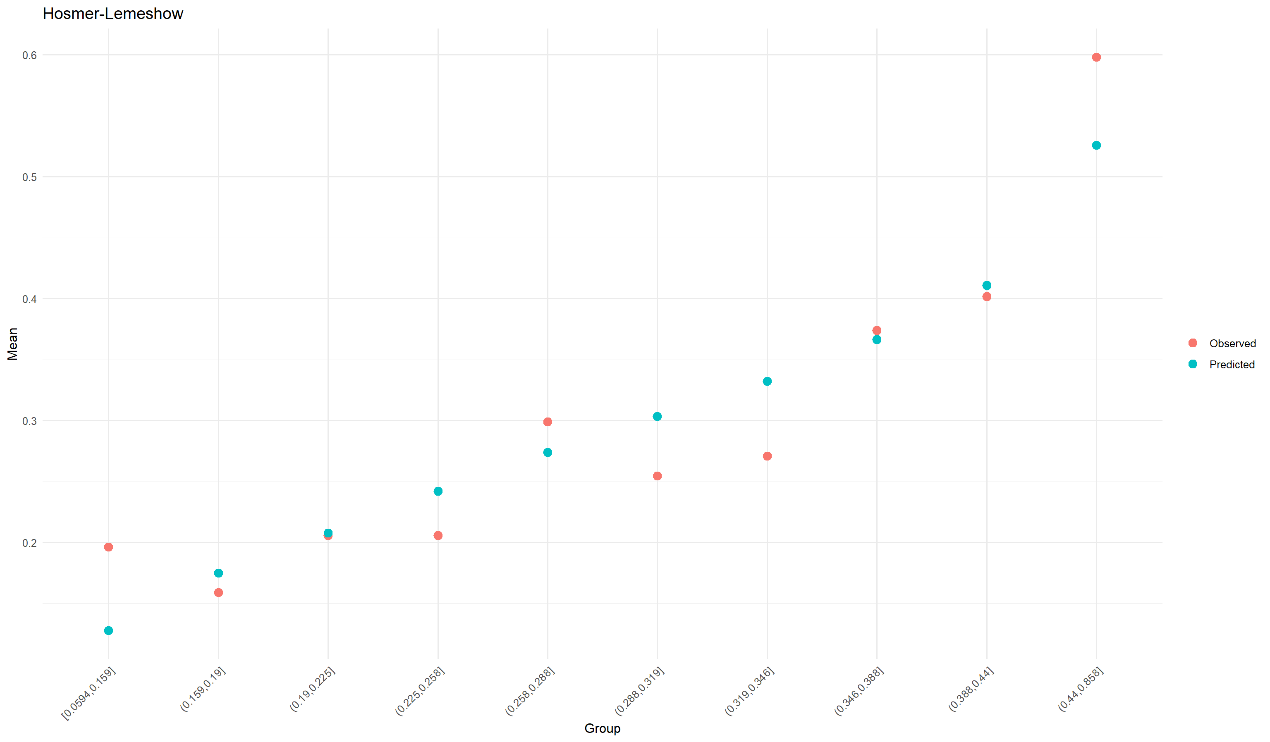


**Supplementary Figure S6. Comparison of observed and predicted values ​​of the nocturnal hypoxemia prediction model by group (based on HAD, age, sex, and BMI)**


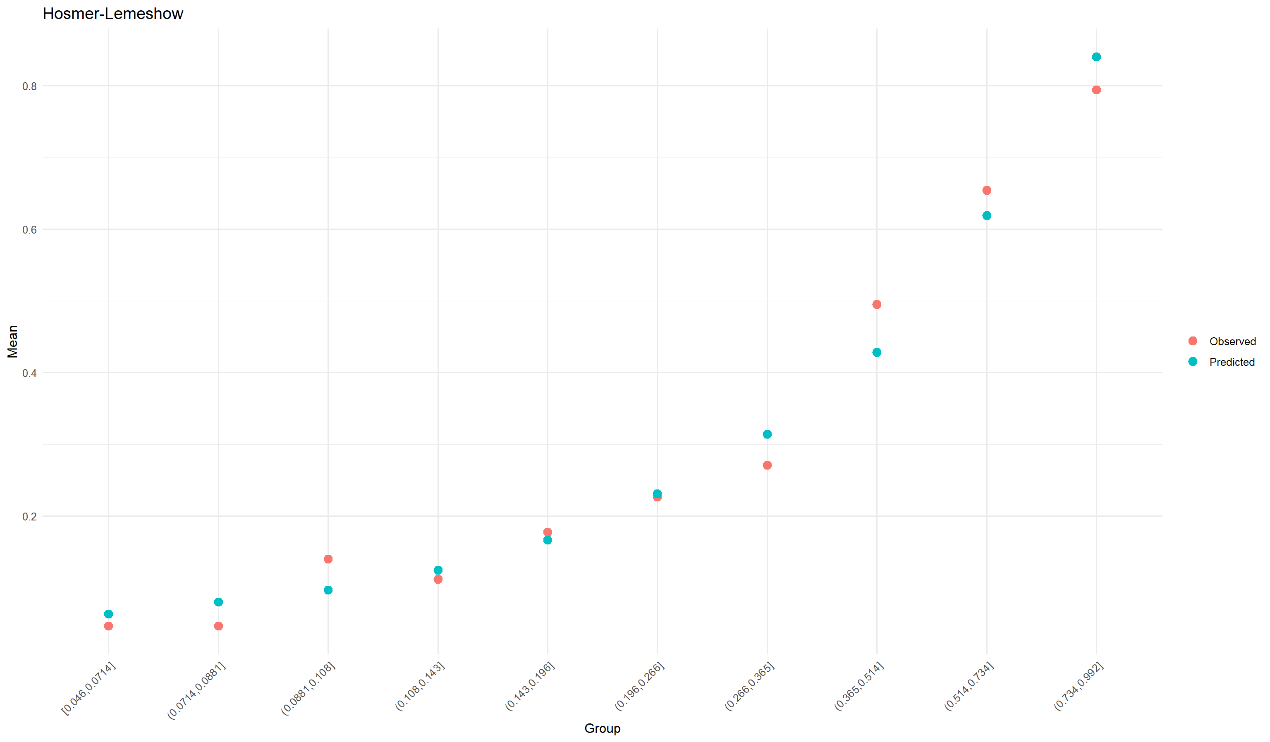

Supplement: Supplementary file 1 [file get_supplementary_file.php]
